# Supplementary material for: Effect of Different Salt Additions on the Flavor Profile of Fermented Ciba Pepper
Source: MDPI journal article supplement (doi:10.3390/fermentation10020111), 2024-02-18
Supplement: s1 [file s1]

Table S1. The peak volume of the flavor profile, as characterized by GC-IMS in ciba pepper samples with varying salt concentrations, was determined (mean  $\pm$  sd).

| Count   | Compound              | CAS       | Molecule                                      | MW    | RI     | Rt(s)   | Dt(ms)  | LJA                              | LJB                               | LJC                              | LJD                              | LJE                               |
|---------|-----------------------|-----------|-----------------------------------------------|-------|--------|---------|---------|----------------------------------|-----------------------------------|----------------------------------|----------------------------------|-----------------------------------|
|         |                       |           | Formula                                       |       |        |         |         |                                  |                                   |                                  |                                  |                                   |
| Alcohol | 2-furanmethanol       | 98-00-0   | C <sub>5</sub> H <sub>6</sub> O <sub>2</sub>  | 98.1  | 894.7  | 244.055 | 1.3702  | 119.1 $\pm$ 15.54 <sup>c</sup>   | 361.6 $\pm$ 12.47 <sup>a</sup>    | 243.25 $\pm$ 32.05 <sup>b</sup>  | 185.44 $\pm$ 11.43 <sup>b</sup>  | 207.76 $\pm$ 32.39 <sup>b</sup>   |
|         | (Z)-2-Penten1ol       | 1576-95-0 | C <sub>5</sub> H <sub>10</sub> O              | 86.1  | 772.6  | 176.859 | 1.42855 | 406.23 $\pm$ 19.35 <sup>a</sup>  | 378.28 $\pm$ 13.25 <sup>a</sup>   | 443.61 $\pm$ 22.63 <sup>a</sup>  | 436.04 $\pm$ 43.5 <sup>a</sup>   | 403.99 $\pm$ 34.47 <sup>a</sup>   |
|         | 1-propanethiol        | 107-03-9  | C <sub>3</sub> H <sub>8</sub> S               | 76.2  | 842.7  | 213.477 | 1.16314 | 139.63 $\pm$ 4.85 <sup>c</sup>   | 195.62 $\pm$ 2.69 <sup>a</sup>    | 144.36 $\pm$ 9.65 <sup>c</sup>   | 102.67 $\pm$ 9.86 <sup>d</sup>   | 170.57 $\pm$ 6.93 <sup>b</sup>    |
|         | propanol              | 71-23-8   | C <sub>3</sub> H <sub>8</sub> O               | 60.1  | 1008.3 | 353.786 | 1.10306 | 1124.73 $\pm$ 19.78 <sup>b</sup> | 1155.14 $\pm$ 15.68 <sup>b</sup>  | 1390.39 $\pm$ 25.4 <sup>a</sup>  | 1353.62 $\pm$ 24.75 <sup>a</sup> | 1350.24 $\pm$ 9.42 <sup>a</sup>   |
|         | 1-Decanol             | 112-30-1  | C <sub>10</sub> H <sub>22</sub> O             | 158.3 | 1217.4 | 743.761 | 1.62597 | 2006.1 $\pm$ 72.03 <sup>b</sup>  | 1871.41 $\pm$ 52.21 <sup>bc</sup> | 2520.1 $\pm$ 403.99 <sup>a</sup> | 1608.3 $\pm$ 178.59 <sup>c</sup> | 1774.37 $\pm$ 28.12 <sup>bc</sup> |
|         | 2,3-Butanediol        | 513-85-9  | C <sub>4</sub> H <sub>10</sub> O <sub>2</sub> | 90.1  | 782.7  | 179.437 | 1.36415 | 117.33 $\pm$ 9.23 <sup>c</sup>   | 179.04 $\pm$ 0.67 <sup>bc</sup>   | 177.25 $\pm$ 33.52 <sup>bc</sup> | 303.8 $\pm$ 29.91 <sup>a</sup>   | 245.12 $\pm$ 45.03 <sup>ab</sup>  |
|         | 2-Butanol             | 78-92-2   | C <sub>4</sub> H <sub>10</sub> O              | 74.1  | 635    | 128.589 | 1.15062 | 1261.85 $\pm$ 50.69 <sup>a</sup> | 1151.36 $\pm$ 42.65 <sup>a</sup>  | 635.77 $\pm$ 42.79 <sup>b</sup>  | 548.76 $\pm$ 29.94 <sup>bc</sup> | 441.85 $\pm$ 31.08 <sup>c</sup>   |
|         | pent-1-en-3-ol-M      | 616-25-1  | C <sub>5</sub> H <sub>10</sub> O              | 86.1  | 684.3  | 153.057 | 0.94634 | 191.24 $\pm$ 3.62 <sup>d</sup>   | 245.47 $\pm$ 6.26 <sup>c</sup>    | 509.59 $\pm$ 15.98 <sup>a</sup>  | 540.03 $\pm$ 35.27 <sup>a</sup>  | 416.74 $\pm$ 25.99 <sup>b</sup>   |
|         | (E)-3-Hexen-1-ol      | 928-97-2  | C <sub>6</sub> H <sub>12</sub> O              | 100.2 | 893.9  | 243.418 | 1.55739 | 72.35 $\pm$ 5.58 <sup>d</sup>    | 355.79 $\pm$ 10.55 <sup>ab</sup>  | 388.32 $\pm$ 71.43 <sup>a</sup>  | 195.72 $\pm$ 39.86 <sup>c</sup>  | 257.6 $\pm$ 47.84 <sup>bc</sup>   |
|         | 1-Propanol, 2-methyl- | 78-83-1   | C <sub>4</sub> H <sub>10</sub> O              | 74.1  | 1078.7 | 485.171 | 1.17003 | 78.48 $\pm$ 11.62 <sup>b</sup>   | 99.08 $\pm$ 1.06 <sup>b</sup>     | 158.72 $\pm$ 11.45 <sup>a</sup>  | 144.69 $\pm$ 9.76 <sup>a</sup>   | 149.56 $\pm$ 5.8 <sup>a</sup>     |

Table S1. (continued).

| Count    | Compound              | CAS       | Molecule<br>Formula                          | MW    | RI     | Rt (s)  | Dt<br>(ms) | LJA                         | LJB                        | LJC                        | LJD                         | LJE                        |
|----------|-----------------------|-----------|----------------------------------------------|-------|--------|---------|------------|-----------------------------|----------------------------|----------------------------|-----------------------------|----------------------------|
|          | 1,2-Propanediol       | 57-55-6   | C <sub>3</sub> H <sub>8</sub> O <sub>2</sub> | 76.1  | 735.4  | 167.265 | 1.29365    | 60.34±1.7 <sup>b</sup>      | 125.53±8.37 <sup>a</sup>   | 47.71±2.18 <sup>b</sup>    | 53.65±7.04 <sup>b</sup>     | 44.45±8.3 <sup>b</sup>     |
|          | 1-hexanol             | 111-27-3  | C <sub>6</sub> H <sub>14</sub> O             | 102.2 | 853.1  | 219.466 | 1.32533    | 25.35±1.25 <sup>d</sup>     | 21.4±1.35 <sup>d</sup>     | 104.92±9.81 <sup>c</sup>   | 332.34±1.02 <sup>a</sup>    | 142.27±11.99 <sup>b</sup>  |
| Alcohol  | 4-Methyl-1-pentanol   | 626-89-1  | C <sub>6</sub> H <sub>14</sub> O             | 102.2 | 844.8  | 214.674 | 1.32443    | 4.11±2.15 <sup>d</sup>      | 15.09±1.92 <sup>c</sup>    | 44.49±7.23 <sup>c</sup>    | 165.74±20.21 <sup>a</sup>   | 79.64±8.89 <sup>b</sup>    |
|          | 3-Methyl-1-pentanol   | 589-35-5  | C <sub>6</sub> H <sub>14</sub> O             | 102.2 | 819.3  | 200.025 | 1.32424    | 143.79±7.43 <sup>d</sup>    | 95.62±6.02 <sup>c</sup>    | 659.73±73.38 <sup>c</sup>  | 2137.01±122.57 <sup>a</sup> | 932.74±45.45 <sup>b</sup>  |
|          | pent-1-en-3-ol-D      | 616-25-1  | C <sub>5</sub> H <sub>10</sub> O             | 86.1  | 685.8  | 153.849 | 1.33038    | 2140.34±51.88 <sup>a</sup>  | 1651±68.72 <sup>b</sup>    | 347.15±34.88 <sup>c</sup>  | 354.57±50.71 <sup>c</sup>   | 448.23±81.91 <sup>c</sup>  |
|          | (E)-2-hexenal         | 6728-26-3 | C <sub>6</sub> H <sub>10</sub> O             | 98.1  | 1217.7 | 744.341 | 1.19728    | 6461.57±91.01 <sup>b</sup>  | 6352.18±86.78 <sup>b</sup> | 7071.7±190.49 <sup>a</sup> | 6017.15±294.41 <sup>c</sup> | 6294.62±41.03 <sup>b</sup> |
|          | 2-hydroxybenzaldehyde | 90-02-8   | C <sub>7</sub> H <sub>6</sub> O <sub>2</sub> | 122.1 | 1047.8 | 427.59  | 1.1479     | 272.17±25.06 <sup>b</sup>   | 368.48±9.62 <sup>a</sup>   | 215.44±3.59 <sup>c</sup>   | 292.96±24.86 <sup>b</sup>   | 197.6±2.18 <sup>c</sup>    |
| Aldehyde | 3-methylbutanal       | 590-86-3  | C <sub>5</sub> H <sub>10</sub> O             | 86.1  | 638.3  | 130.253 | 1.18838    | 2007.77±157.78 <sup>a</sup> | 1600.86±20.61 <sup>b</sup> | 934.56±53.83 <sup>d</sup>  | 1276±112.05 <sup>c</sup>    | 714.09±63.75 <sup>d</sup>  |
|          | 2-methylbutanal       | 96-17-3   | C <sub>5</sub> H <sub>10</sub> O             | 86.1  | 672.8  | 147.385 | 1.1758     | 258.24±16.97 <sup>a</sup>   | 242.35±4.45 <sup>a</sup>   | 100.92±15.27 <sup>c</sup>  | 189.29±3.92 <sup>b</sup>    | 118.04±7.96 <sup>c</sup>   |
|          | 3-Methyl-2-butenal    | 107-86-8  | C <sub>5</sub> H <sub>8</sub> O              | 84.1  | 786    | 180.867 | 1.08255    | 59.32±4.07 <sup>c</sup>     | 91.27±1.2 <sup>bc</sup>    | 63.51±10.94 <sup>c</sup>   | 131.04±14.46 <sup>a</sup>   | 97.39±17.34 <sup>ab</sup>  |

Table S1. (continued).

| Count    | Compound                   | CAS       | Molecule<br>Formula                           | MW    | RI    | Rt (s)  | Dt<br>(ms) | LJA                       | LJB                        | LJC                       | LJD                        | LJE                        |
|----------|----------------------------|-----------|-----------------------------------------------|-------|-------|---------|------------|---------------------------|----------------------------|---------------------------|----------------------------|----------------------------|
| Aldehyde | 2-methylpropanal           | 78-84-2   | C <sub>4</sub> H <sub>8</sub> O               | 72.1  | 783.4 | 179.62  | 1.30507    | 51.13±4.1 <sup>b</sup>    | 177.94±4.95 <sup>a</sup>   | 55.96±5.56 <sup>b</sup>   | 177.63±20.92 <sup>a</sup>  | 69.21±12.43 <sup>b</sup>   |
|          | Butanal                    | 123-72-8  | C <sub>4</sub> H <sub>8</sub> O               | 72.1  | 857.6 | 222.038 | 1.27537    | 32.69±1.26 <sup>b</sup>   | 61.7±1.19 <sup>a</sup>     | 14.75±1.57 <sup>c</sup>   | 19.12±1.95 <sup>c</sup>    | 16.5±2.28 <sup>c</sup>     |
|          | Furfural                   | 98-01-1   | C <sub>5</sub> H <sub>4</sub> O <sub>2</sub>  | 96.1  | 835.3 | 209.188 | 1.32463    | 106.3±3.51 <sup>d</sup>   | 61.59±3.33 <sup>c</sup>    | 225.35±23.33 <sup>c</sup> | 1011.44±54.08 <sup>a</sup> | 348.55±36.84 <sup>b</sup>  |
|          | trans-2-pentenal           | 1576-87-0 | C <sub>5</sub> H <sub>8</sub> O               | 84.1  | 741.6 | 168.875 | 1.37037    | 14.94±1.28 <sup>cd</sup>  | 12.95±0.56 <sup>d</sup>    | 29.59±2.7 <sup>a</sup>    | 19.03±3.46 <sup>bc</sup>   | 21.88±2.51 <sup>ab</sup>   |
| Acid     | 2-methylbutanoic acid-D    | 116-53-0  | C <sub>5</sub> H <sub>10</sub> O <sub>2</sub> | 102.1 | 840.8 | 212.352 | 1.46864    | 172.97±5.8 <sup>b</sup>   | 277.79±11.45 <sup>a</sup>  | 164.19±6.89 <sup>c</sup>  | 136.75±6.91 <sup>d</sup>   | 164.26±5.92 <sup>bc</sup>  |
|          | acetic acid                | 64-19-7   | C <sub>2</sub> H <sub>4</sub> O <sub>2</sub>  | 60.1  | 611.8 | 117.085 | 1.04722    | 2031.95±19.5 <sup>c</sup> | 2129.27±54.41 <sup>c</sup> | 3496.21±43 <sup>a</sup>   | 2458.79±85.02 <sup>b</sup> | 3429.99±43.62 <sup>a</sup> |
|          | 2-Methylbutanoic acid-M    | 116-53-0  | C <sub>5</sub> H <sub>10</sub> O <sub>2</sub> | 102.1 | 852.9 | 219.354 | 1.20229    | 208.31±22.49 <sup>c</sup> | 122.03±3.83 <sup>d</sup>   | 329.05±17.82 <sup>b</sup> | 360.36±5.16 <sup>ab</sup>  | 394.43±6.43 <sup>a</sup>   |
|          | 3-methylbutyric acid       | 503-74-2  | C <sub>5</sub> H <sub>10</sub> O <sub>2</sub> | 102.1 | 817.5 | 199.003 | 1.47341    | 83.69±1.75 <sup>b</sup>   | 303.19±21.93 <sup>a</sup>  | 65.75±2.32 <sup>c</sup>   | 27.97±1.44 <sup>d</sup>    | 60.09±3.27 <sup>c</sup>    |
| Ester    | Propanoic acid             | 79-09-4   | C <sub>3</sub> H <sub>6</sub> O <sub>2</sub>  | 74.1  | 654.6 | 138.341 | 1.26372    | 113.23±11.81 <sup>d</sup> | 179.27±8.62 <sup>cd</sup>  | 338.42±50.88 <sup>a</sup> | 244.51±23.92 <sup>bc</sup> | 325.7±29.56 <sup>ab</sup>  |
|          | Acetic acid 2-propyl ester | 108-21-4  | C <sub>5</sub> H <sub>10</sub> O <sub>2</sub> | 102.1 | 909.4 | 256.773 | 1.47796    | 531.5±30.38 <sup>a</sup>  | 405.94±21.59 <sup>b</sup>  | 327.68±23.45 <sup>c</sup> | 296.87±28.2 <sup>c</sup>   | 337.65±34.91 <sup>bc</sup> |

Table S1. (continued).

| Count | Compound                         | CAS        | Molecule                                      | MW    | RI     | Rt(s)   | Dt(ms)  | LJA                         | LJB                          | LJC                         | LJD                         | LJE                         |
|-------|----------------------------------|------------|-----------------------------------------------|-------|--------|---------|---------|-----------------------------|------------------------------|-----------------------------|-----------------------------|-----------------------------|
|       |                                  |            | Formula                                       |       |        |         |         |                             |                              |                             |                             |                             |
| Ester | isoamyl acetate                  | 123-92-2   | C <sub>7</sub> H <sub>14</sub> O <sub>2</sub> | 130.2 | 1135.1 | 590.369 | 1.30748 | 5571.87±68 <sup>bc</sup>    | 5895.82±175.63 <sup>ab</sup> | 5576.43±196.39 <sup>c</sup> | 6057.23±211.71 <sup>d</sup> | 5575.6±195.86 <sup>bc</sup> |
|       | Butyl 2-methylbutanoate          | 15706-73-7 | C <sub>9</sub> H <sub>18</sub> O <sub>2</sub> | 158.2 | 1218.6 | 746.061 | 1.38933 | 639.19±22.04 <sup>b</sup>   | 598.87±17.57 <sup>c</sup>    | 825.66±45.63 <sup>a</sup>   | 512.38±64.36 <sup>d</sup>   | 578.46±10.03 <sup>c</sup>   |
|       | isobutyl butyrate                | 539-90-2   | C <sub>8</sub> H <sub>16</sub> O <sub>2</sub> | 144.2 | 955.8  | 296.774 | 1.32179 | 468.8±6.44 <sup>c</sup>     | 480.22±9.62 <sup>c</sup>     | 559.55±5.04 <sup>b</sup>    | 663.91±10.97 <sup>a</sup>   | 553.65±26.87 <sup>b</sup>   |
|       | Acetic acid, hexyl ester         | 142-92-7   | C <sub>8</sub> H <sub>16</sub> O <sub>2</sub> | 144.2 | 1008.1 | 353.405 | 1.39124 | 108.39±4.73 <sup>ab</sup>   | 103.68±10.84 <sup>b</sup>    | 131.81±15.56 <sup>a</sup>   | 95.19±6.59 <sup>b</sup>     | 103.16±7.69 <sup>b</sup>    |
|       | Ethyl 2-methylbutanoate          | 7452-79-1  | C <sub>7</sub> H <sub>14</sub> O <sub>2</sub> | 130.2 | 1052   | 435.316 | 1.64048 | 583.36±103.75 <sup>a</sup>  | 294.73±3.94 <sup>b</sup>     | 137.78±21.31 <sup>c</sup>   | 192.22±20.23 <sup>bc</sup>  | 256.94±86.36 <sup>b</sup>   |
|       | Methyl 2-methylbutanoate-M       | 868-57-5   | C <sub>6</sub> H <sub>12</sub> O <sub>2</sub> | 116.2 | 1008.5 | 354.218 | 1.19047 | 336.81±4.61 <sup>b</sup>    | 303.6±13.13 <sup>c</sup>     | 374.78±9.94 <sup>ab</sup>   | 379.78±2.73 <sup>a</sup>    | 366.21±6.08 <sup>ab</sup>   |
|       | Butyl formate                    | 592-84-7   | C <sub>5</sub> H <sub>10</sub> O <sub>2</sub> | 102.1 | 1033.8 | 401.336 | 1.21029 | 1976.12±113.77 <sup>b</sup> | 2044.31±145.18 <sup>b</sup>  | 2076.83±217.15 <sup>b</sup> | 2336.33±155.54 <sup>a</sup> | 2269.21±16.14 <sup>a</sup>  |
|       | methyl 3-methylbutanoate         | 556-24-1   | C <sub>6</sub> H <sub>12</sub> O <sub>2</sub> | 116.2 | 783.4  | 179.632 | 1.20558 | 483.09±11.04 <sup>c</sup>   | 499.19±11.52 <sup>c</sup>    | 672.84±28.88 <sup>b</sup>   | 801.81±22.46 <sup>a</sup>   | 764.03±32.16 <sup>a</sup>   |
|       | Formic acid, 3-methylbutyl ester | 110-45-2   | C <sub>6</sub> H <sub>12</sub> O <sub>2</sub> | 116.2 | 782.6  | 179.416 | 1.27869 | 149.44±0.11 <sup>a</sup>    | 120.09±3.36 <sup>b</sup>     | 76.6±5.93 <sup>c</sup>      | 61.98±9.11 <sup>c</sup>     | 65.71±6.47 <sup>c</sup>     |

Table S1. (continued).

| Count | Compound                             | CAS       | Molecule                                       | MW    | RI     | Rt(s)   | Dt(ms)  | LJA                         | LJB                        | LJC                         | LJD                         | LJE                          |
|-------|--------------------------------------|-----------|------------------------------------------------|-------|--------|---------|---------|-----------------------------|----------------------------|-----------------------------|-----------------------------|------------------------------|
|       |                                      |           | Formula                                        |       |        |         |         |                             |                            |                             |                             |                              |
| Ester | Isobutyl isobutyrate                 | 97-85-8   | C <sub>8</sub> H <sub>16</sub> O <sub>2</sub>  | 144.2 | 1080.8 | 489.107 | 1.29028 | 152.18±13.78 <sup>a</sup>   | 155.42±21.96 <sup>a</sup>  | 163.11±16.78 <sup>a</sup>   | 154.31±13.64 <sup>a</sup>   | 164.98±3.72 <sup>a</sup>     |
|       | Linalyl acetate                      | 115-95-7  | C <sub>12</sub> H <sub>20</sub> O <sub>2</sub> | 196.3 | 1248.7 | 802.071 | 1.19953 | 631.32±17.25 <sup>ab</sup>  | 619.64±25.34 <sup>b</sup>  | 574.01±67.49 <sup>c</sup>   | 659.01±30.02 <sup>a</sup>   | 654.08±3.19 <sup>a</sup>     |
|       | Ethyl isovalerate                    | 108-64-5  | C <sub>7</sub> H <sub>14</sub> O <sub>2</sub>  | 130.2 | 1068   | 465.201 | 1.67191 | 1000.21±9.24 <sup>a</sup>   | 977.13±16.27 <sup>ab</sup> | 955.59±12.2 <sup>ab</sup>   | 891.95±15.75 <sup>b</sup>   | 907.78±2.04 <sup>b</sup>     |
|       | Methyl 2-methylbutanoate-D           | 868-57-5  | C <sub>6</sub> H <sub>12</sub> O <sub>2</sub>  | 116.2 | 1008.2 | 353.692 | 1.55135 | 223.9±11.47 <sup>b</sup>    | 213.76±12.09 <sup>b</sup>  | 305.26±34.24 <sup>a</sup>   | 224.8±19.86 <sup>b</sup>    | 221.85±6.13 <sup>b</sup>     |
|       | propyl acetate                       | 109-60-4  | C <sub>5</sub> H <sub>10</sub> O <sub>2</sub>  | 102.1 | 932.6  | 276.726 | 1.47554 | 883.93±37.43 <sup>c</sup>   | 884.41±3.12 <sup>c</sup>   | 1083.24±41.69 <sup>b</sup>  | 1485.68±8.4 <sup>a</sup>    | 1122.22±31.82 <sup>b</sup>   |
|       | acetic acid ethyl ester              | 141-78-6  | C <sub>4</sub> H <sub>8</sub> O <sub>2</sub>   | 88.1  | 624.3  | 123.299 | 1.11267 | 4893.64±86.94 <sup>ab</sup> | 5032.11±66.16 <sup>a</sup> | 4647.97±158.01 <sup>c</sup> | 4125.46±104.43 <sup>d</sup> | 4568.07±118.22 <sup>bc</sup> |
|       | 2(3H)-Furanone,<br>dihydro-5-methyl- | 108-29-2  | C <sub>5</sub> H <sub>8</sub> O <sub>2</sub>   | 100.1 | 947.6  | 289.657 | 1.41396 | 46.02±4.58 <sup>b</sup>     | 44.04±3.52 <sup>bc</sup>   | 35.92±1.94 <sup>c</sup>     | 97.01±3.03 <sup>a</sup>     | 3.78±5.53 <sup>bc</sup>      |
|       | (Z)-3-hexenyl acetate                | 3681-71-8 | C <sub>8</sub> H <sub>14</sub> O <sub>2</sub>  | 142.2 | 1008.1 | 353.388 | 1.31726 | 185.61±11.87 <sup>c</sup>   | 186.69±7.76 <sup>c</sup>   | 219.58±12.24 <sup>ab</sup>  | 227.69±5.02 <sup>a</sup>    | 197.5±7.1 <sup>bc</sup>      |
|       | Ethyl butanoate                      | 105-54-4  | C <sub>6</sub> H <sub>12</sub> O <sub>2</sub>  | 116.2 | 799.5  | 188.63  | 1.20525 | 211.66±11.58 <sup>c</sup>   | 259.3±7.7 <sup>b</sup>     | 249.04±5.15 <sup>bc</sup>   | 314.67±3.56 <sup>a</sup>    | 311.59±9.88 <sup>a</sup>     |

Table S1. (continued).

| Count  | Compound                  | CAS       | Molecule                                      | MW    | RI     | Rt(s)   | Dt(ms)  | LJA                         | LJB                        | LJC                        | LJD                        | LJE                       |
|--------|---------------------------|-----------|-----------------------------------------------|-------|--------|---------|---------|-----------------------------|----------------------------|----------------------------|----------------------------|---------------------------|
|        |                           |           | Formula                                       |       |        |         |         |                             |                            |                            |                            |                           |
| Ester  | Isobutyl formate          | 542-55-2  | C <sub>5</sub> H <sub>10</sub> O <sub>2</sub> | 102.1 | 684.7  | 153.256 | 1.20011 | 174.02±1.28 <sup>bc</sup>   | 143.94±5.66 <sup>c</sup>   | 169.59±26.55 <sup>c</sup>  | 274.99±41.8 <sup>a</sup>   | 253±33.01 <sup>ab</sup>   |
|        | Methyl hexanoate          | 106-70-7  | C <sub>7</sub> H <sub>14</sub> O <sub>2</sub> | 130.2 | 910.6  | 257.811 | 1.67521 | 290.56±11.67 <sup>bc</sup>  | 242.65±14 <sup>c</sup>     | 371.89±41.5 <sup>b</sup>   | 570.93±44.37 <sup>a</sup>  | 385.52±46.08 <sup>b</sup> |
|        | ethyl 2-hydroxypropanoate | 97-64-3   | C <sub>5</sub> H <sub>10</sub> O <sub>3</sub> | 118.1 | 820    | 200.429 | 1.1353  | 300.73±39.02 <sup>b</sup>   | 825.23±14.01 <sup>a</sup>  | 185.12±15.83 <sup>c</sup>  | 62.41±8.71 <sup>d</sup>    | 93.5±6.75 <sup>d</sup>    |
|        | 3-Hepten-2-one            | 1119-44-4 | C <sub>7</sub> H <sub>12</sub> O              | 112.2 | 935.4  | 279.146 | 1.63823 | 240.77±18.3 <sup>b</sup>    | 252.3±9.37 <sup>b</sup>    | 258.11±8.37 <sup>b</sup>   | 282.15±12.29 <sup>a</sup>  | 225.35±6.46 <sup>b</sup>  |
|        | 4-Methyl-2-pentanone      | 108-10-1  | C <sub>6</sub> H <sub>12</sub> O              | 100.2 | 1008.2 | 353.692 | 1.45582 | 1315.64±31.07 <sup>cd</sup> | 1286.75±70.72 <sup>d</sup> | 1639.48±71.86 <sup>a</sup> | 1358.11±70.62 <sup>c</sup> | 1391.36±8.2 <sup>b</sup>  |
| Ketone | 2-butanone                | 78-93-3   | C <sub>4</sub> H <sub>8</sub> O               | 72.1  | 867.4  | 227.641 | 1.24852 | 273.38±14.24 <sup>a</sup>   | 270.57±4.53 <sup>a</sup>   | 276.31±11.27 <sup>a</sup>  | 168.6±5.56 <sup>c</sup>    | 236.82±10.6 <sup>b</sup>  |
|        | cyclopentanone-D          | 120-92-3  | C <sub>5</sub> H <sub>8</sub> O               | 84.1  | 793    | 184.895 | 1.34483 | 515.83±21.36 <sup>b</sup>   | 486.05±10.29 <sup>bc</sup> | 767.06±53.23 <sup>a</sup>  | 462.25±18.46 <sup>bc</sup> | 438.38±31.73 <sup>c</sup> |
|        | 2-Propanone, 1-hydroxy-   | 116-09-6  | C <sub>3</sub> H <sub>6</sub> O <sub>2</sub>  | 74.1  | 672.8  | 147.382 | 1.2431  | 763.44±58.77 <sup>a</sup>   | 850.37±24.06 <sup>a</sup>  | 806.89±62.45 <sup>a</sup>  | 750.6±46.07 <sup>ab</sup>  | 638.45±45.88 <sup>b</sup> |
|        | 1-Penten-3-one            | 1629-58-9 | C <sub>5</sub> H <sub>8</sub> O               | 84.1  | 675.5  | 148.706 | 1.28415 | 454.22±18.89 <sup>a</sup>   | 439.32±17.02 <sup>a</sup>  | 270.65±16.96 <sup>b</sup>  | 286.79±18.42 <sup>b</sup>  | 283.55±20.73 <sup>b</sup> |
|        | cyclopentanone-M          | 120-92-3  | C <sub>5</sub> H <sub>8</sub> O               | 84.1  | 792.6  | 184.688 | 1.11323 | 270.1±13.3 <sup>b</sup>     | 174.13±3.24 <sup>c</sup>   | 418.57±17.15 <sup>a</sup>  | 185.44±0.29 <sup>c</sup>   | 247.87±9.89 <sup>b</sup>  |

Table S1. (continued).

| Count  | Compound                         | CAS        | Molecule                                      | MW    | RI     | Rt(s)   | Dt(ms)  | LJA                          | LJB                          | LJC                         | LJD                         | LJE                        |
|--------|----------------------------------|------------|-----------------------------------------------|-------|--------|---------|---------|------------------------------|------------------------------|-----------------------------|-----------------------------|----------------------------|
|        |                                  |            | Formula                                       |       |        |         |         |                              |                              |                             |                             |                            |
| Ketone | 1-(acetyloxy)-2-propanone        | 592-20-1   | C <sub>5</sub> H <sub>8</sub> O <sub>3</sub>  | 116.1 | 870.8  | 229.641 | 1.2029  | 142.43±19.01 <sup>c</sup>    | 119.06±5.73 <sup>c</sup>     | 210.31±8.9 <sup>b</sup>     | 270.51±11.74 <sup>a</sup>   | 259.68±7.37 <sup>a</sup>   |
|        | Pentan-2-one                     | 107-87-9   | C <sub>5</sub> H <sub>10</sub> O              | 86.1  | 982.7  | 319.903 | 1.11619 | 85.25±3.87 <sup>b</sup>      | 80.99±4.61 <sup>b</sup>      | 94.17±9.47 <sup>ab</sup>    | 93.2±2.56 <sup>ab</sup>     | 100.74±7.84 <sup>a</sup>   |
|        | gamma-Terpinene                  | 99-85-4    | C <sub>10</sub> H <sub>16</sub>               | 136.2 | 1264.1 | 830.863 | 1.19778 | 1798.85±55.82 <sup>bc</sup>  | 1875.84±39.41 <sup>abc</sup> | 1839.73±110.95 <sup>c</sup> | 1929.89±97.91 <sup>a</sup>  | 1886.84±66.6 <sup>ab</sup> |
| Alkene | Styrene                          | 100-42-5   | C <sub>8</sub> H <sub>8</sub>                 | 104.2 | 866.8  | 227.306 | 1.41231 | 126.66±16.32 <sup>c</sup>    | 153.06±3.42 <sup>c</sup>     | 376.57±26.61 <sup>b</sup>   | 633.07±3.2 <sup>a</sup>     | 378.83±28.28 <sup>b</sup>  |
|        | alpha-Terpinene                  | 99-86-5    | C <sub>10</sub> H <sub>16</sub>               | 136.2 | 1022.2 | 379.781 | 1.21375 | 554.71±32.52 <sup>d</sup>    | 585.09±46.65 <sup>cd</sup>   | 654.13±57.52 <sup>c</sup>   | 780.45±23.59 <sup>a</sup>   | 701.66±10.83 <sup>b</sup>  |
| Ether  | Diethyl trisulfide               | 3600-24-6  | C <sub>4</sub> H <sub>10</sub> S <sub>3</sub> | 154.3 | 1128.3 | 577.668 | 1.21466 | 2611.21±193.44 <sup>ab</sup> | 2708.71±139.64 <sup>a</sup>  | 2435.15±161.09 <sup>b</sup> | 2808.12±145.65 <sup>a</sup> | 2847.51±112.6 <sup>a</sup> |
| Others | 2-Ethyl-3,5-dimethylpyrazine     | 13925-07-0 | C <sub>8</sub> H <sub>12</sub> N <sub>2</sub> | 136.2 | 1080.2 | 487.961 | 1.2153  | 527.3±43.09 <sup>c</sup>     | 556.01±57.04 <sup>bc</sup>   | 592.66±63.57 <sup>bc</sup>  | 673.92±56.92 <sup>a</sup>   | 638.45±21.84 <sup>ab</sup> |
|        | 2-methyl-3-(methylthio)furan-M   | 63012-97-5 | C <sub>6</sub> H <sub>8</sub> OS              | 128.2 | 949.6  | 291.381 | 1.11735 | 1254.15±53.96 <sup>b</sup>   | 978.61±26.45 <sup>c</sup>    | 1387.82±38.79 <sup>a</sup>  | 935.04±65.44 <sup>c</sup>   | 1188.2±9.44 <sup>b</sup>   |
|        | 2-methyl-3-(methylthio)furan-D   | 63012-97-5 | C <sub>6</sub> H <sub>8</sub> OS              | 128.2 | 949.2  | 291.096 | 1.17478 | 233.91±4.52 <sup>b</sup>     | 274.26±7.64 <sup>a</sup>     | 119.85±13.29 <sup>c</sup>   | 286±15.7 <sup>a</sup>       | 140.51±2.02 <sup>c</sup>   |
|        | 1,3-Dioxolane, 2,4-dimethyl, cis | 3390-12-3  | C <sub>5</sub> H <sub>10</sub> O <sub>2</sub> | 102.1 | 703.9  | 159.171 | 1.25552 | 259.97±19.64 <sup>a</sup>    | 233.08±5.69 <sup>a</sup>     | 119.84±12.17 <sup>b</sup>   | 108.46±9.98 <sup>b</sup>    | 107.44±2.47 <sup>b</sup>   |

Table S1. (continued).

| Count  | Compound           | CAS        | Molecule                                      | MW    | RI    | Rt(s)   | Dt(ms)  | LJA                       | LJB                      | LJC                      | LJD                        | LJE                        |
|--------|--------------------|------------|-----------------------------------------------|-------|-------|---------|---------|---------------------------|--------------------------|--------------------------|----------------------------|----------------------------|
|        |                    |            | Formula                                       |       |       |         |         |                           |                          |                          |                            |                            |
| Others | Methylpyrazine     | 109-08-0   | C <sub>5</sub> H <sub>6</sub> N <sub>2</sub>  | 94.1  | 840.7 | 212.306 | 1.3946  | 227.49±17.46 <sup>c</sup> | 262.08±7.96 <sup>c</sup> | 600.19±34.2 <sup>b</sup> | 790.88±8.18 <sup>a</sup>   | 606.31±30.34 <sup>b</sup>  |
|        | (E)-3-Pentenitrile | 16529-66-1 | C <sub>5</sub> H <sub>7</sub> N               | 81.1  | 700.6 | 158.31  | 1.37004 | 46.12±3.03 <sup>b</sup>   | 57.7±1.86 <sup>b</sup>   | 100.37±9.04 <sup>a</sup> | 93.38±15.09 <sup>a</sup>   | 82.06±9.85 <sup>a</sup>    |
|        | Acetal             | 105-57-7   | C <sub>6</sub> H <sub>14</sub> O <sub>2</sub> | 118.2 | 719.2 | 163.095 | 1.13155 | 163.77±27.98 <sup>a</sup> | 117.12±8.49 <sup>a</sup> | 38.64±2.14 <sup>b</sup>  | 31.1±1.99 <sup>b</sup>     | 34.23±3.6 <sup>b</sup>     |
|        | 2-Propenenitrile   | 107-13-1   | C <sub>3</sub> H <sub>3</sub> N               | 53.1  | 649.8 | 135.951 | 1.0859  | 441.73±13.74 <sup>d</sup> | 457.37±4.87 <sup>d</sup> | 758.75±17.9 <sup>c</sup> | 1466.19±16.04 <sup>a</sup> | 1079.95±18.62 <sup>b</sup> |
